# Supplementary material
Source: publisher site journal article supplement (https://www.dovepress.com/article/583478)
Supplement: Supplementary file 1 [file 583478%20Supplementary%20Material.docx]

**
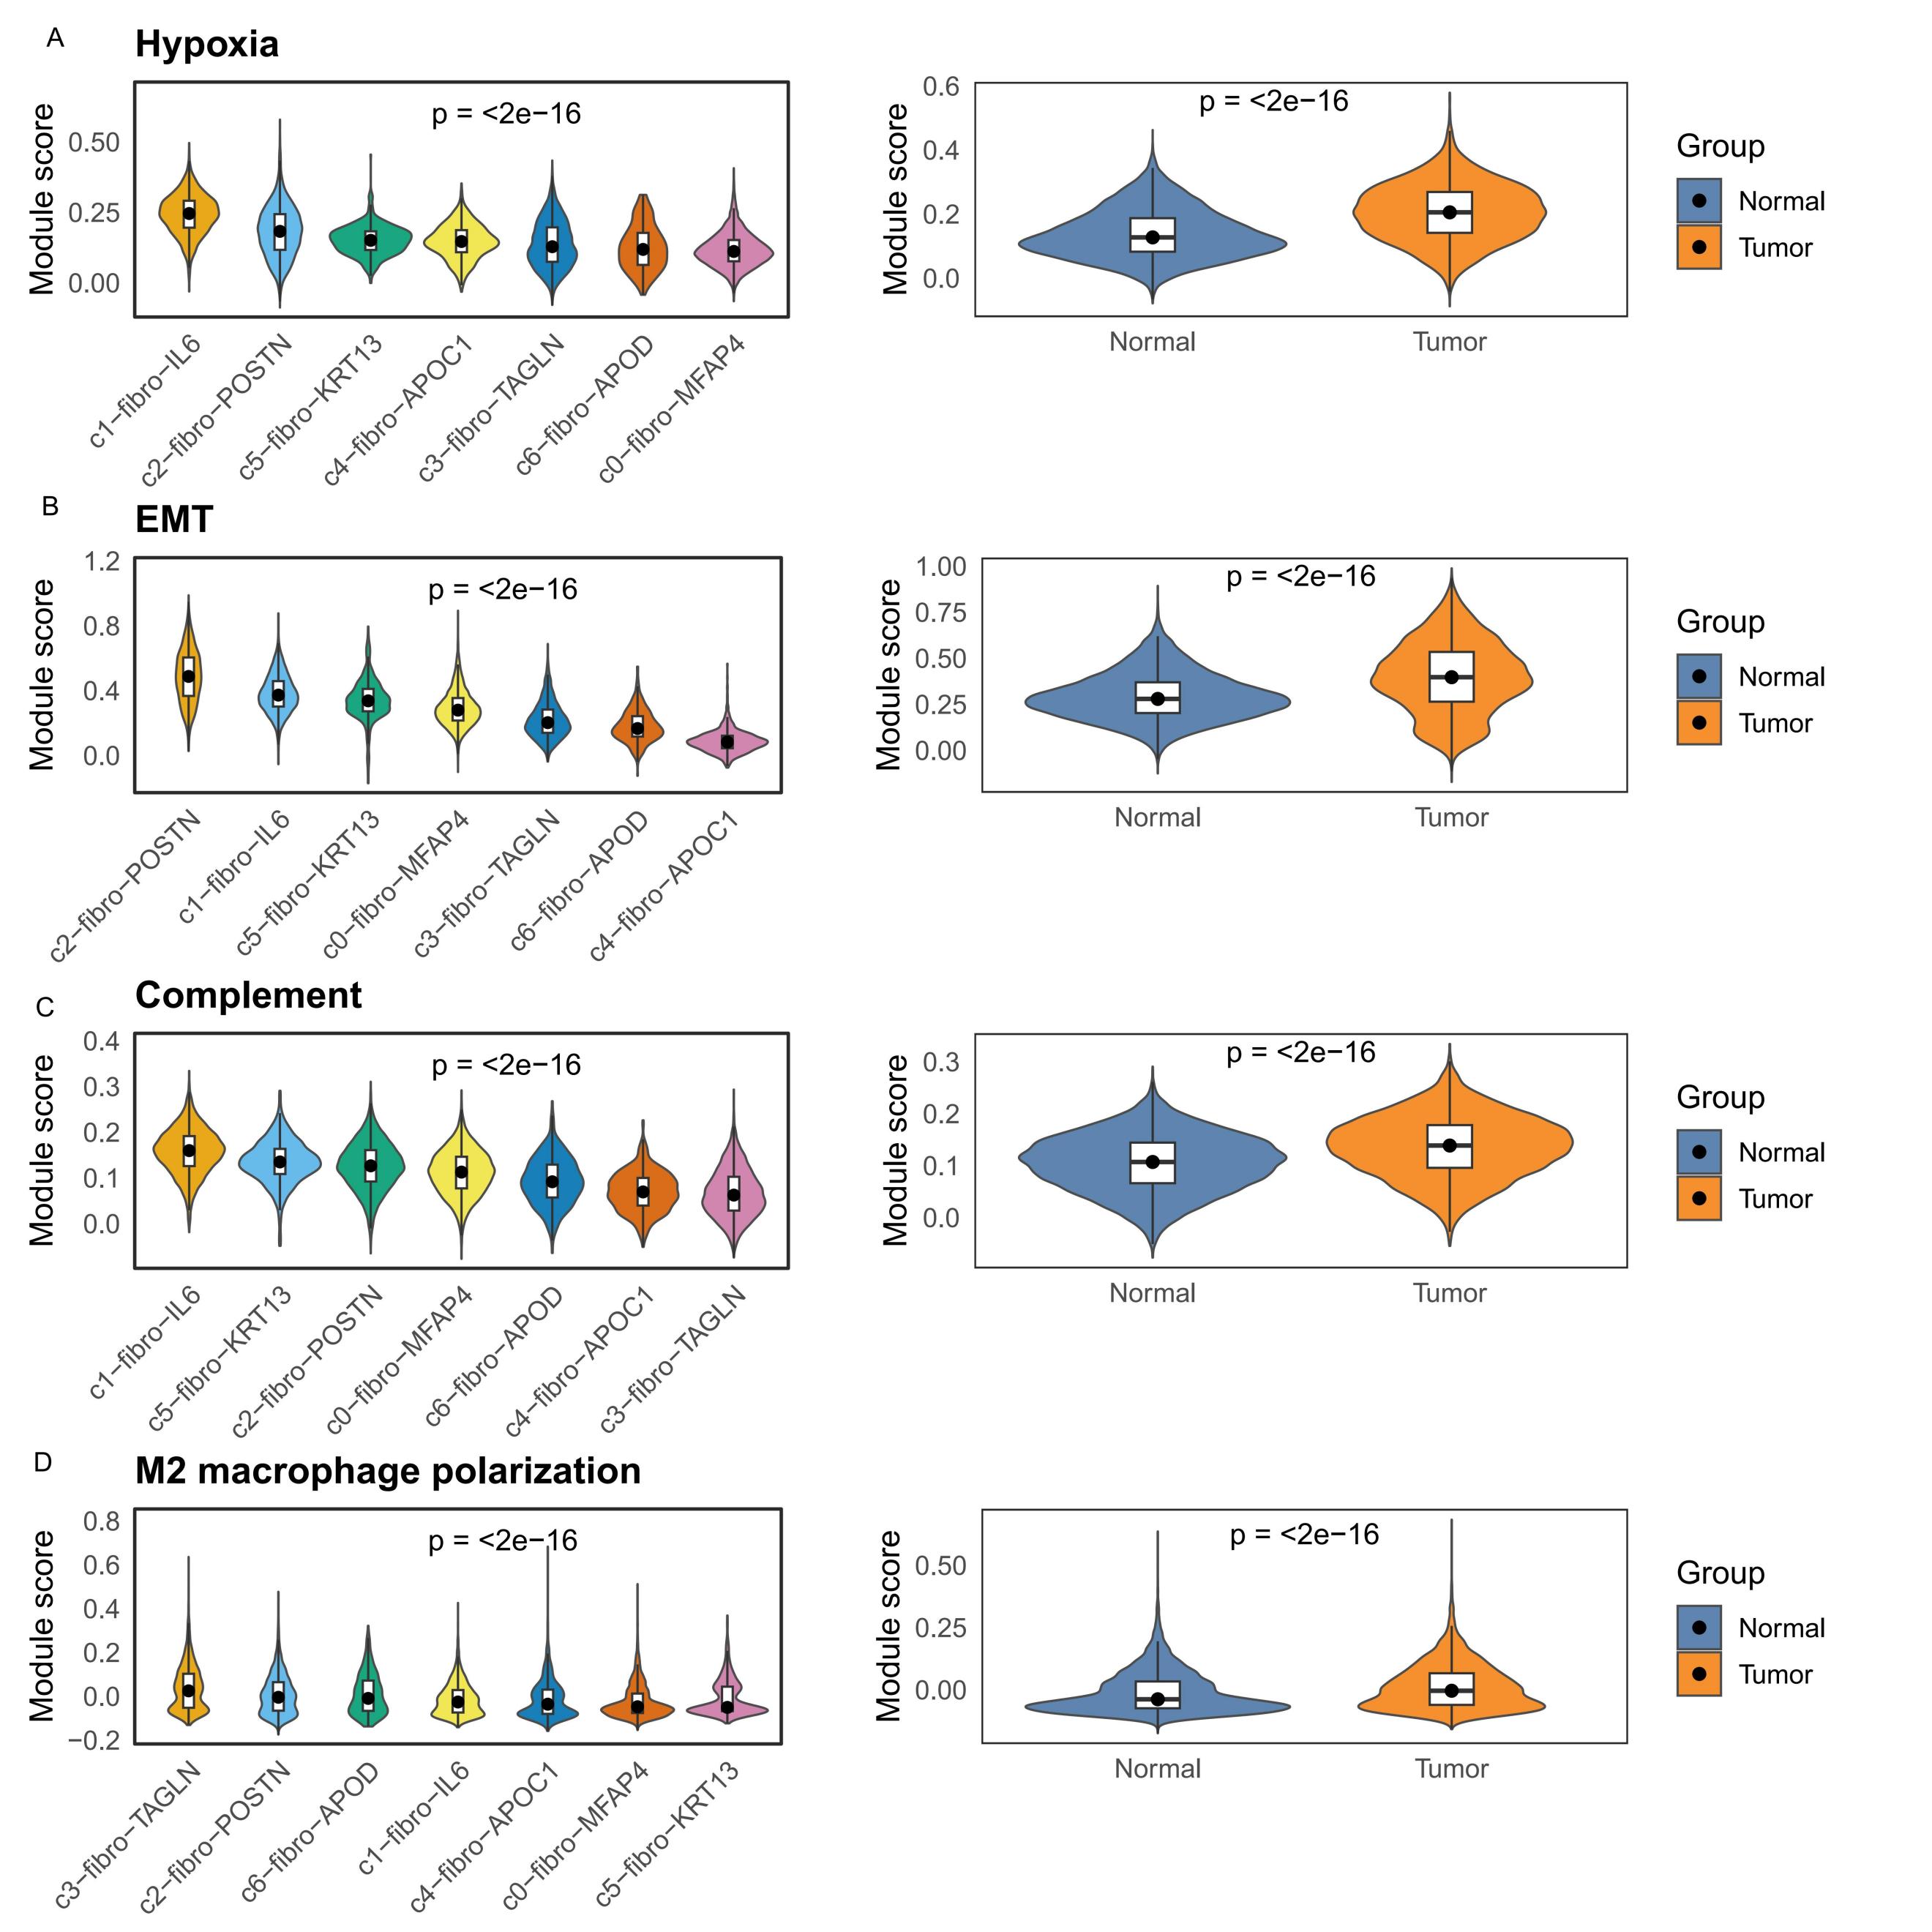
**

**Supplementary Figure 1** Functional module activation of fibroblast subtypes in LSCC.

(A-D) Violin plots showing ssGSEA module scores associated with Hypoxia, EMT, Complement activation, and M2 macrophage polarization across fibroblast subtypes. POSTN⁺ CAFs (c2-fibro-POSTN) exhibit significantly higher activation of EMT.

Abbreviations: LSCC, laryngeal squamous cell carcinoma；CAF, cancer-associated fibroblast; EMT, Epithelial–Mesenchymal Transition.


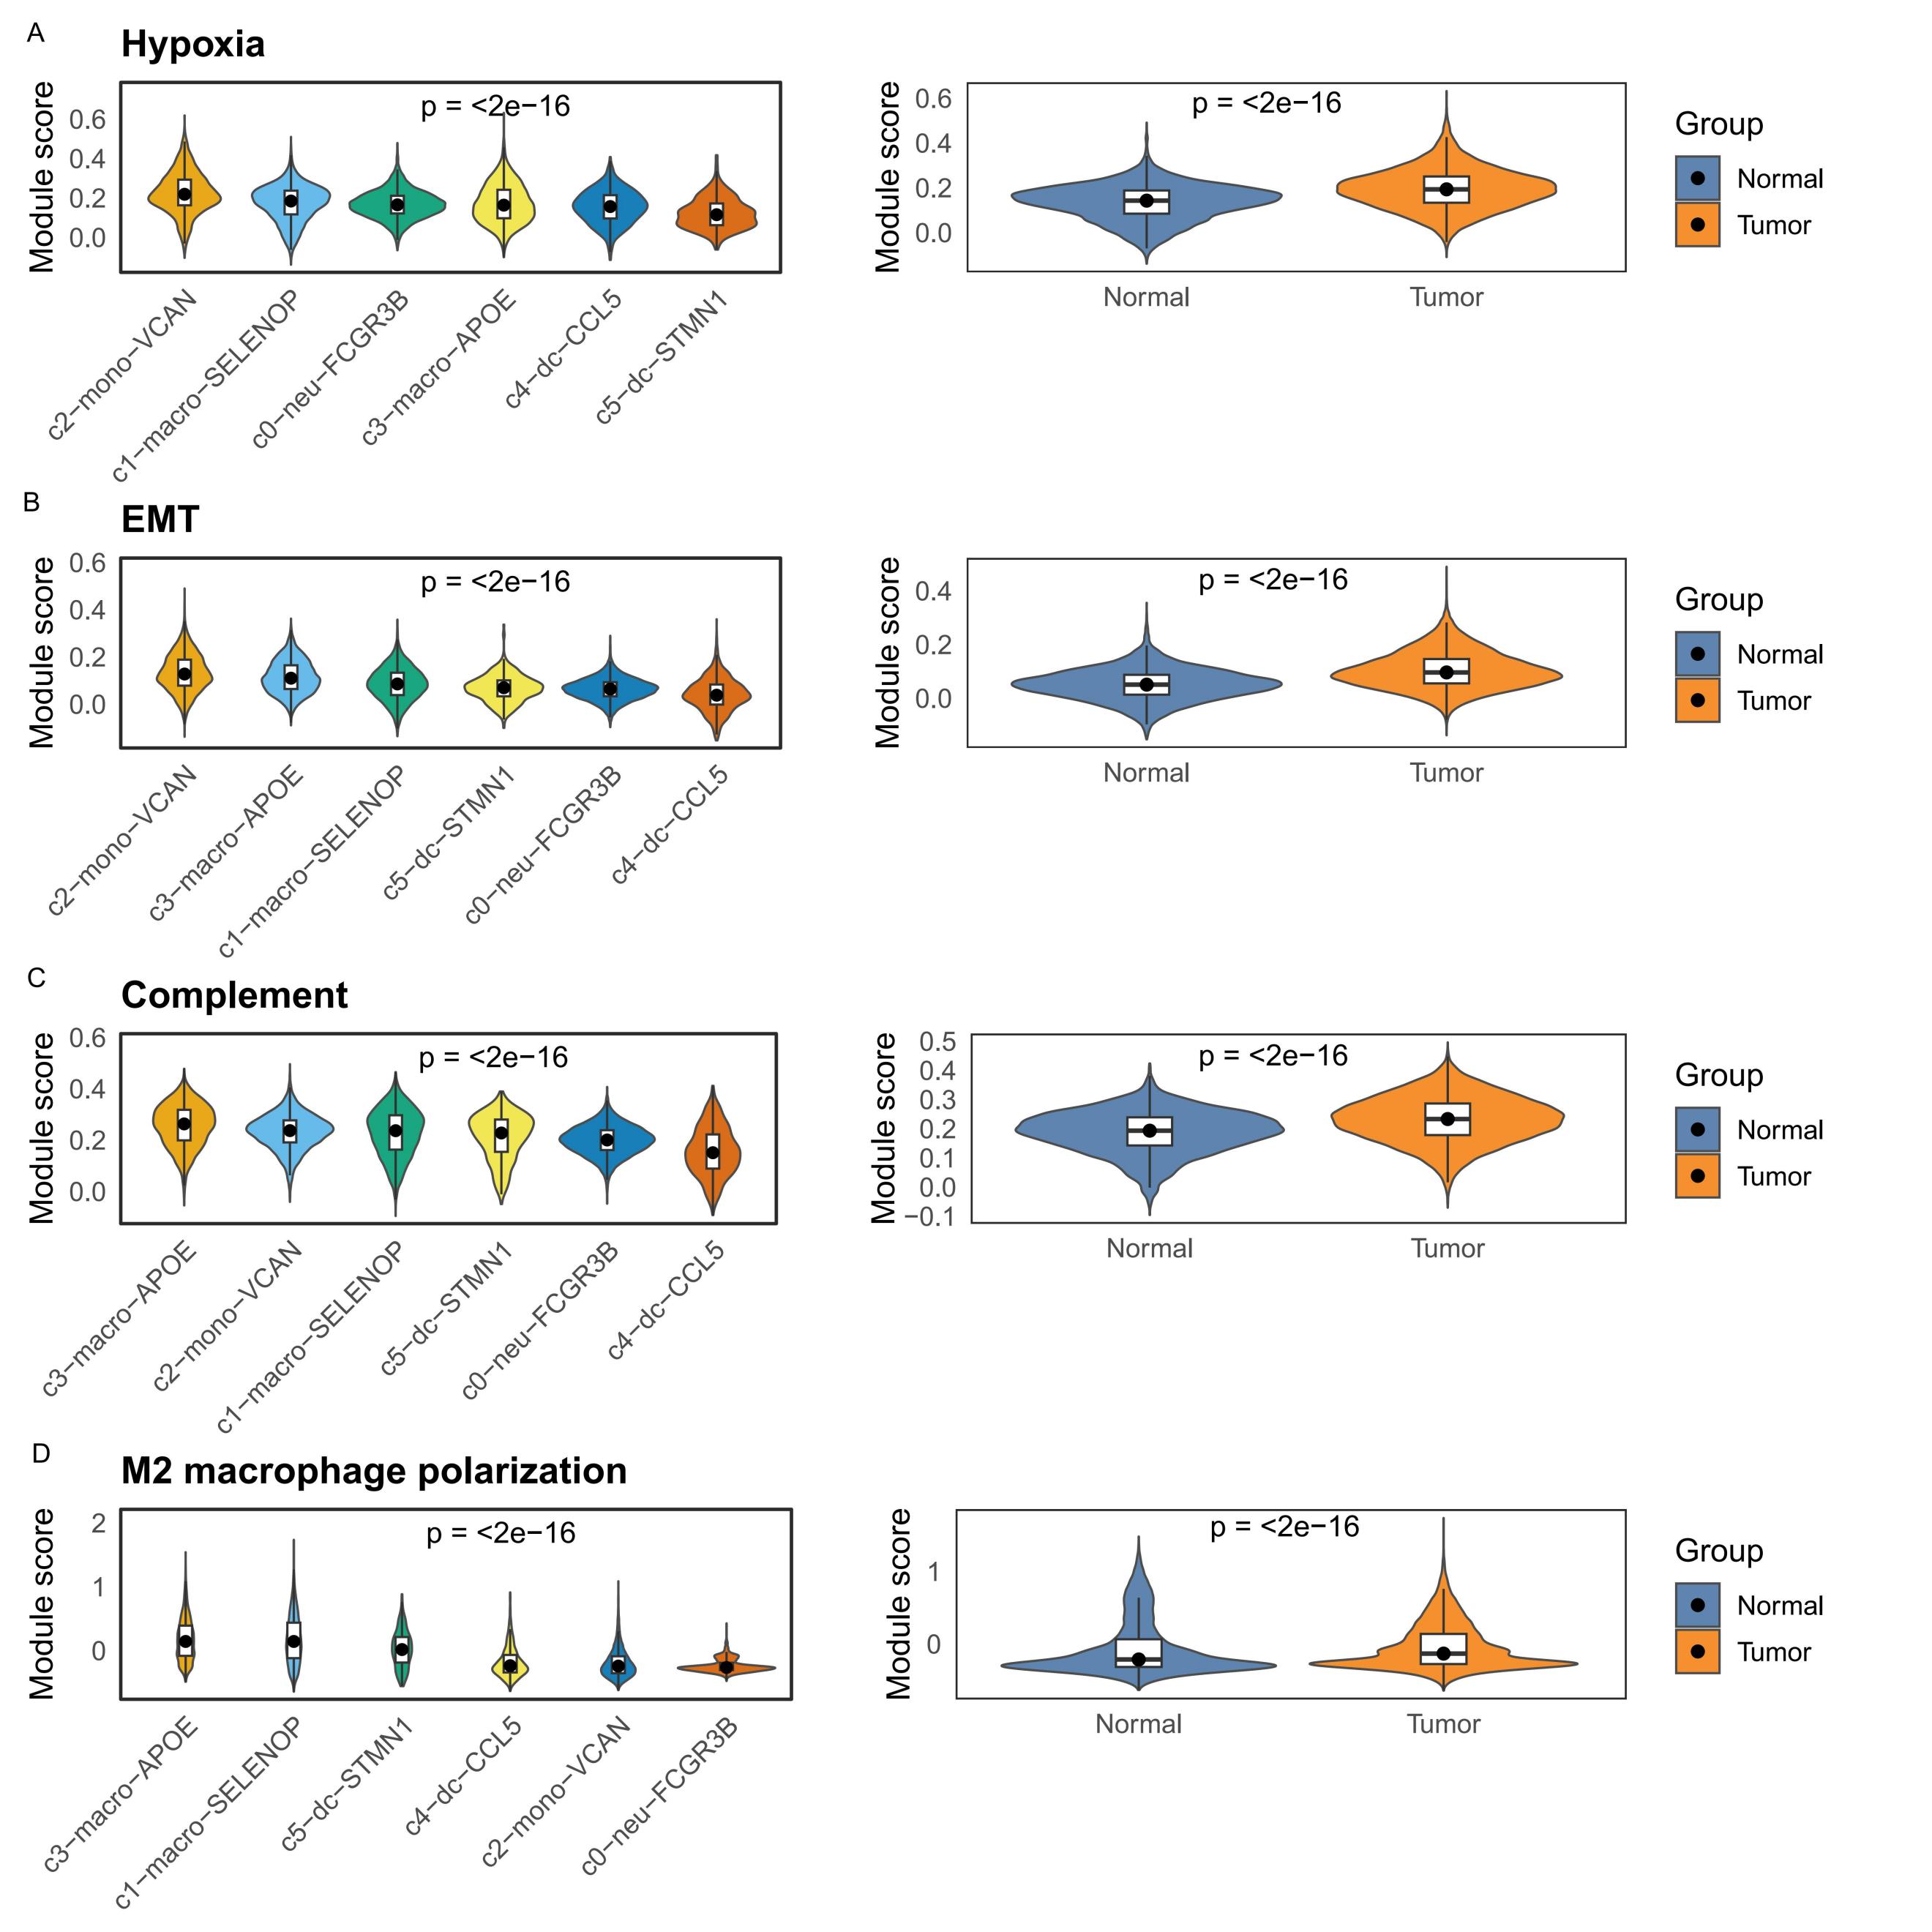


**Supplementary Figure 2** Functional module activation of macrophage subclusters in LSCC.

(A-D) Violin plots showing ssGSEA module scores for Hypoxia, EMT, Complement activation, and M2 macrophage polarization across macrophage subclusters. APOE⁺TAMs (c3-macro-APOE) exhibit significantly higher activation of M2 macrophage polarization.

Abbreviations: LSCC, laryngeal squamous cell carcinoma; TAM, tumor associated macrophage; EMT, Epithelial–Mesenchymal Transition.


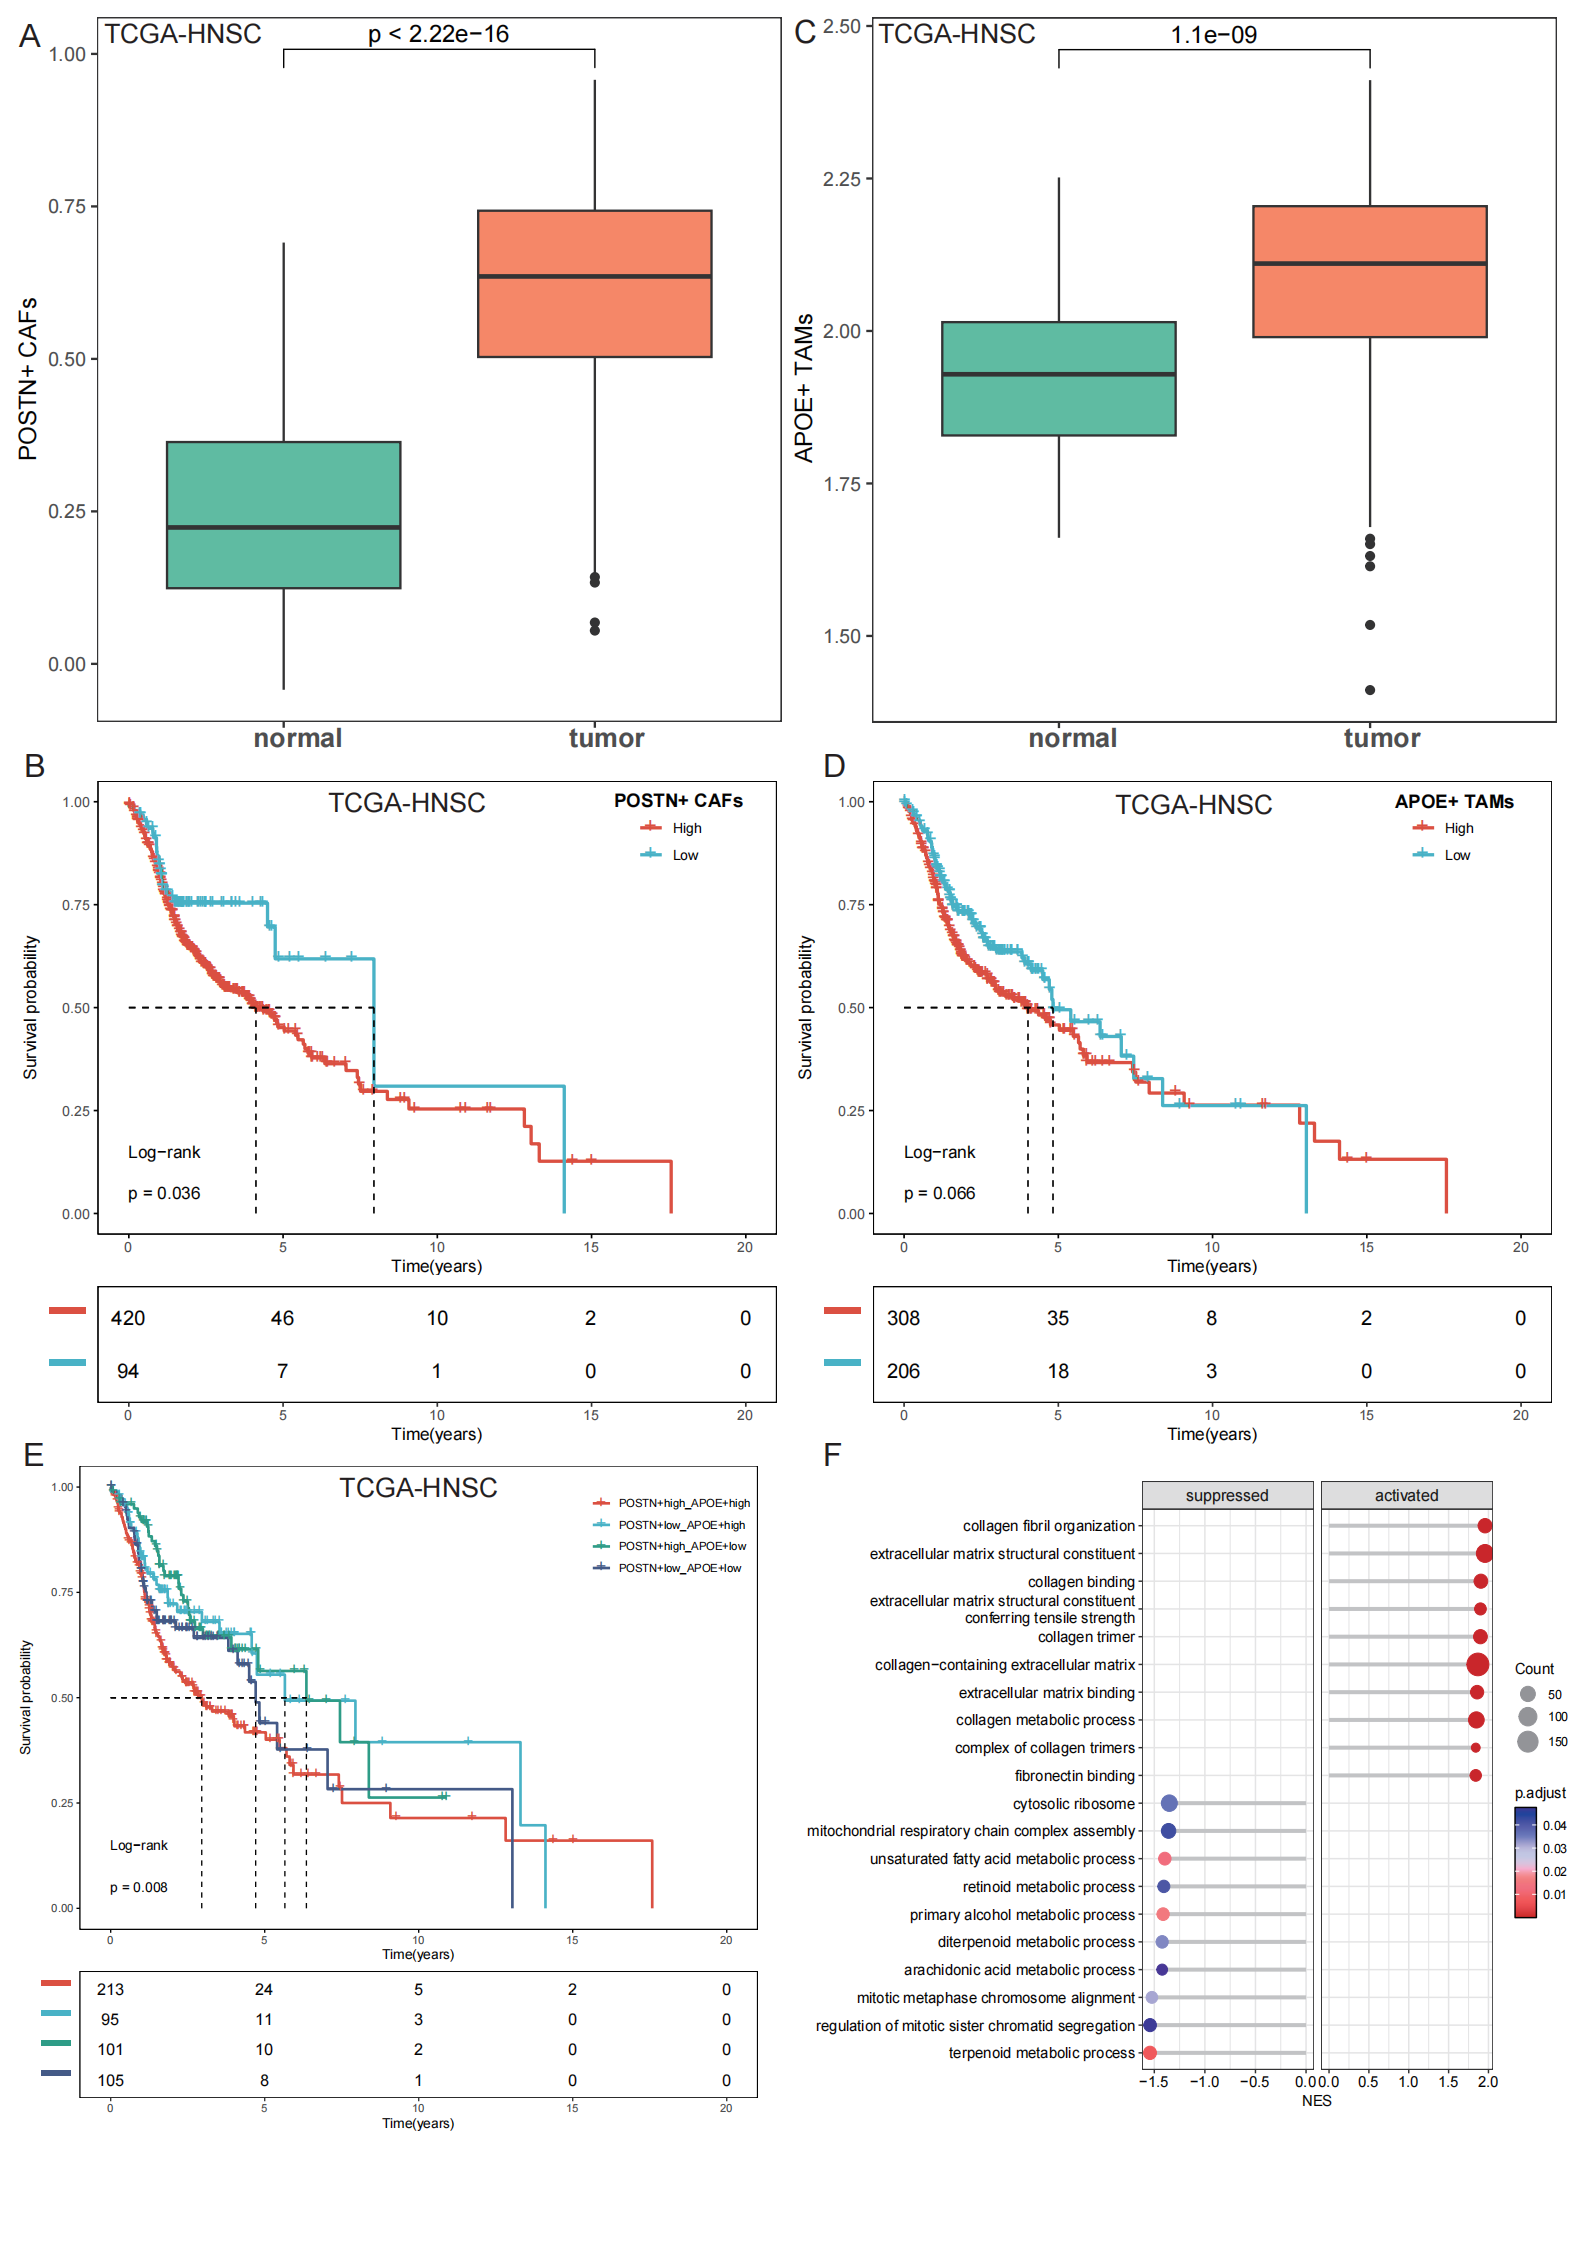


**Supplementary Figure 3 Clinical and functional significance of POSTN+ CAFs and APOE+ TAMs in the TCGA-HNSC cohort**

(A) Quantification of POSTN⁺ CAF abundance in TCGA-HNSC cohort shows significantly higher levels in tumors than normal tissues (Wilcoxon test).

(B) Kaplan–Meier curves reveal poorer overall survival in HNSC patients with high POSTN⁺ CAF infiltration (log-rank test).

(C) TCGA-HNSC cohort confirms higher abundance of APOE⁺TAMs in tumors than normal tissues (Wilcoxon test).

(D) Kaplan–Meier curves show that high APOE⁺TAMs levels are associated with poorer overall survival (log-rank test) in HNSC.

(E) Kaplan-Meier survival analysis shows worst outcomes in POSTN⁺CAFs high/APOE⁺TAMs high group in HNSC.

(F) GO analysis reveals enrichment in extracellular matrix organization and collagen regulation in POSTN⁺CAFshigh/APOE⁺TAMshigh group.


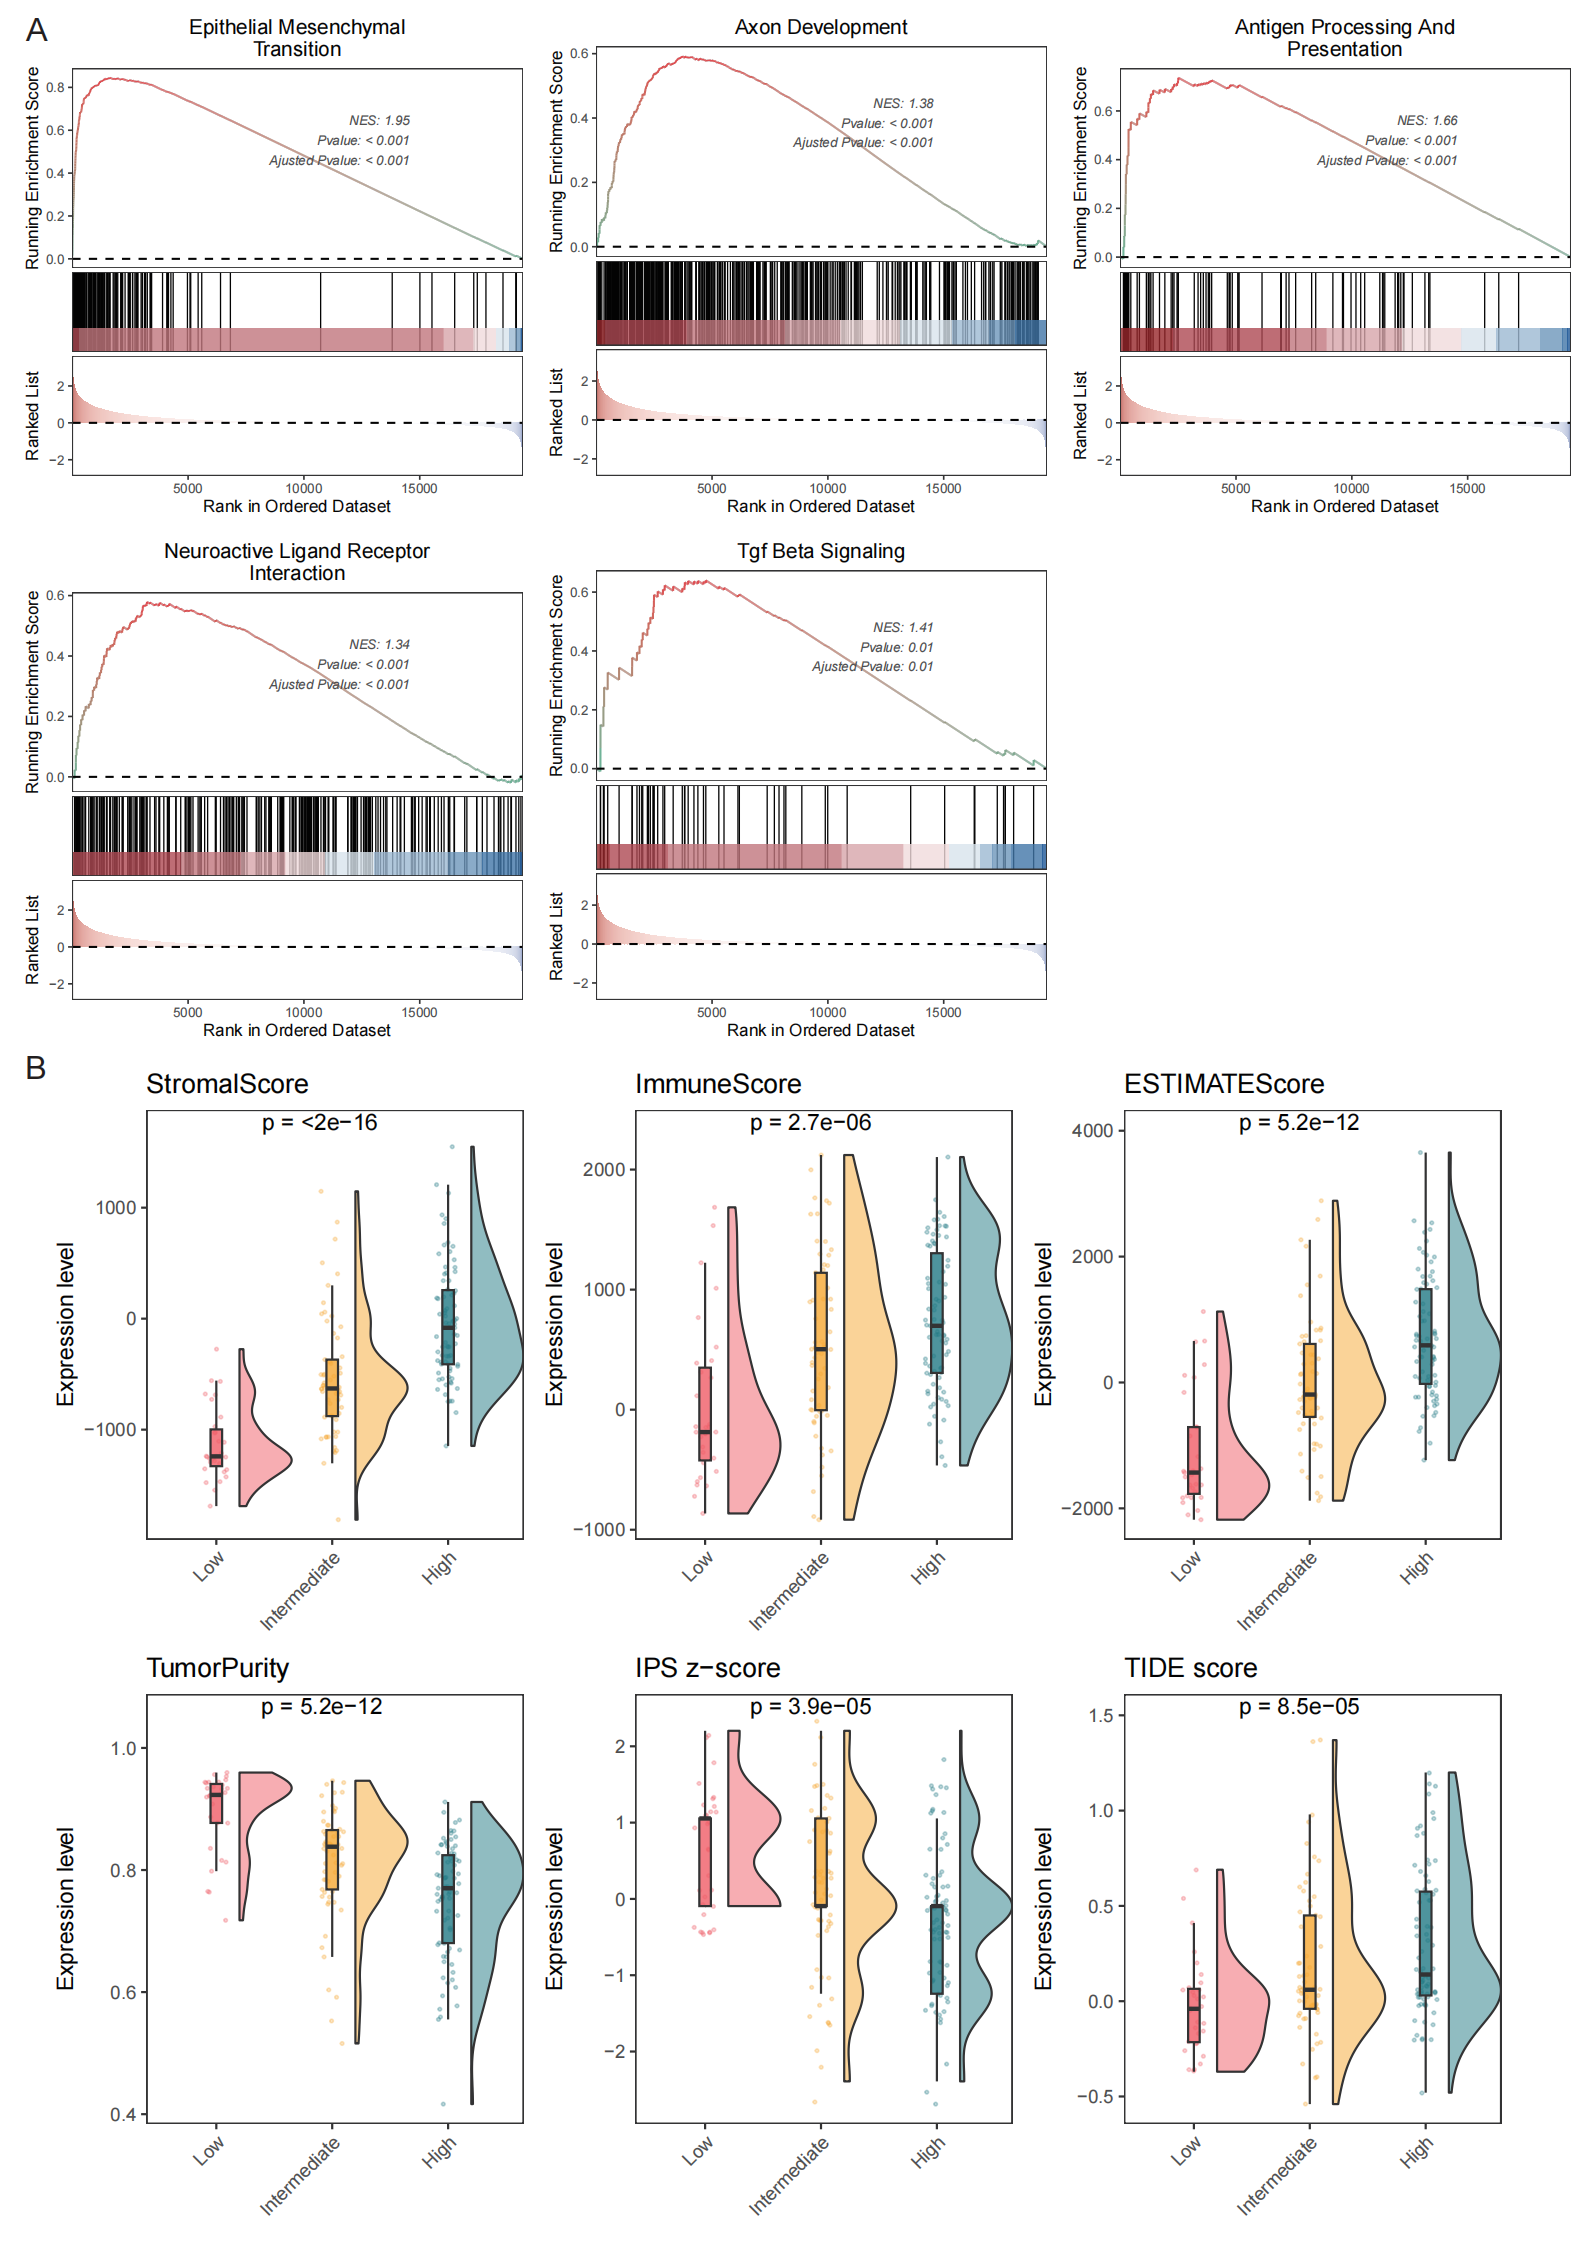


**Supplementary Figure 4 Pathway enrichment and immune microenvironment features of the POSTN+CAFs high/APOE+TAMs high group**

1. GSEA indicates activation of EMT, antigen presentation, neuroactive ligand–receptor signaling, and TGF-β pathways in the POSTN⁺CAFshigh/APOE⁺TAMshigh group.

(B) High POSTN⁺CAFs/APOE⁺TAMs enrichment shows increased stromal, immune, ESTEMATE and TIDE scores but reduced tumor purity and IPS z-score.


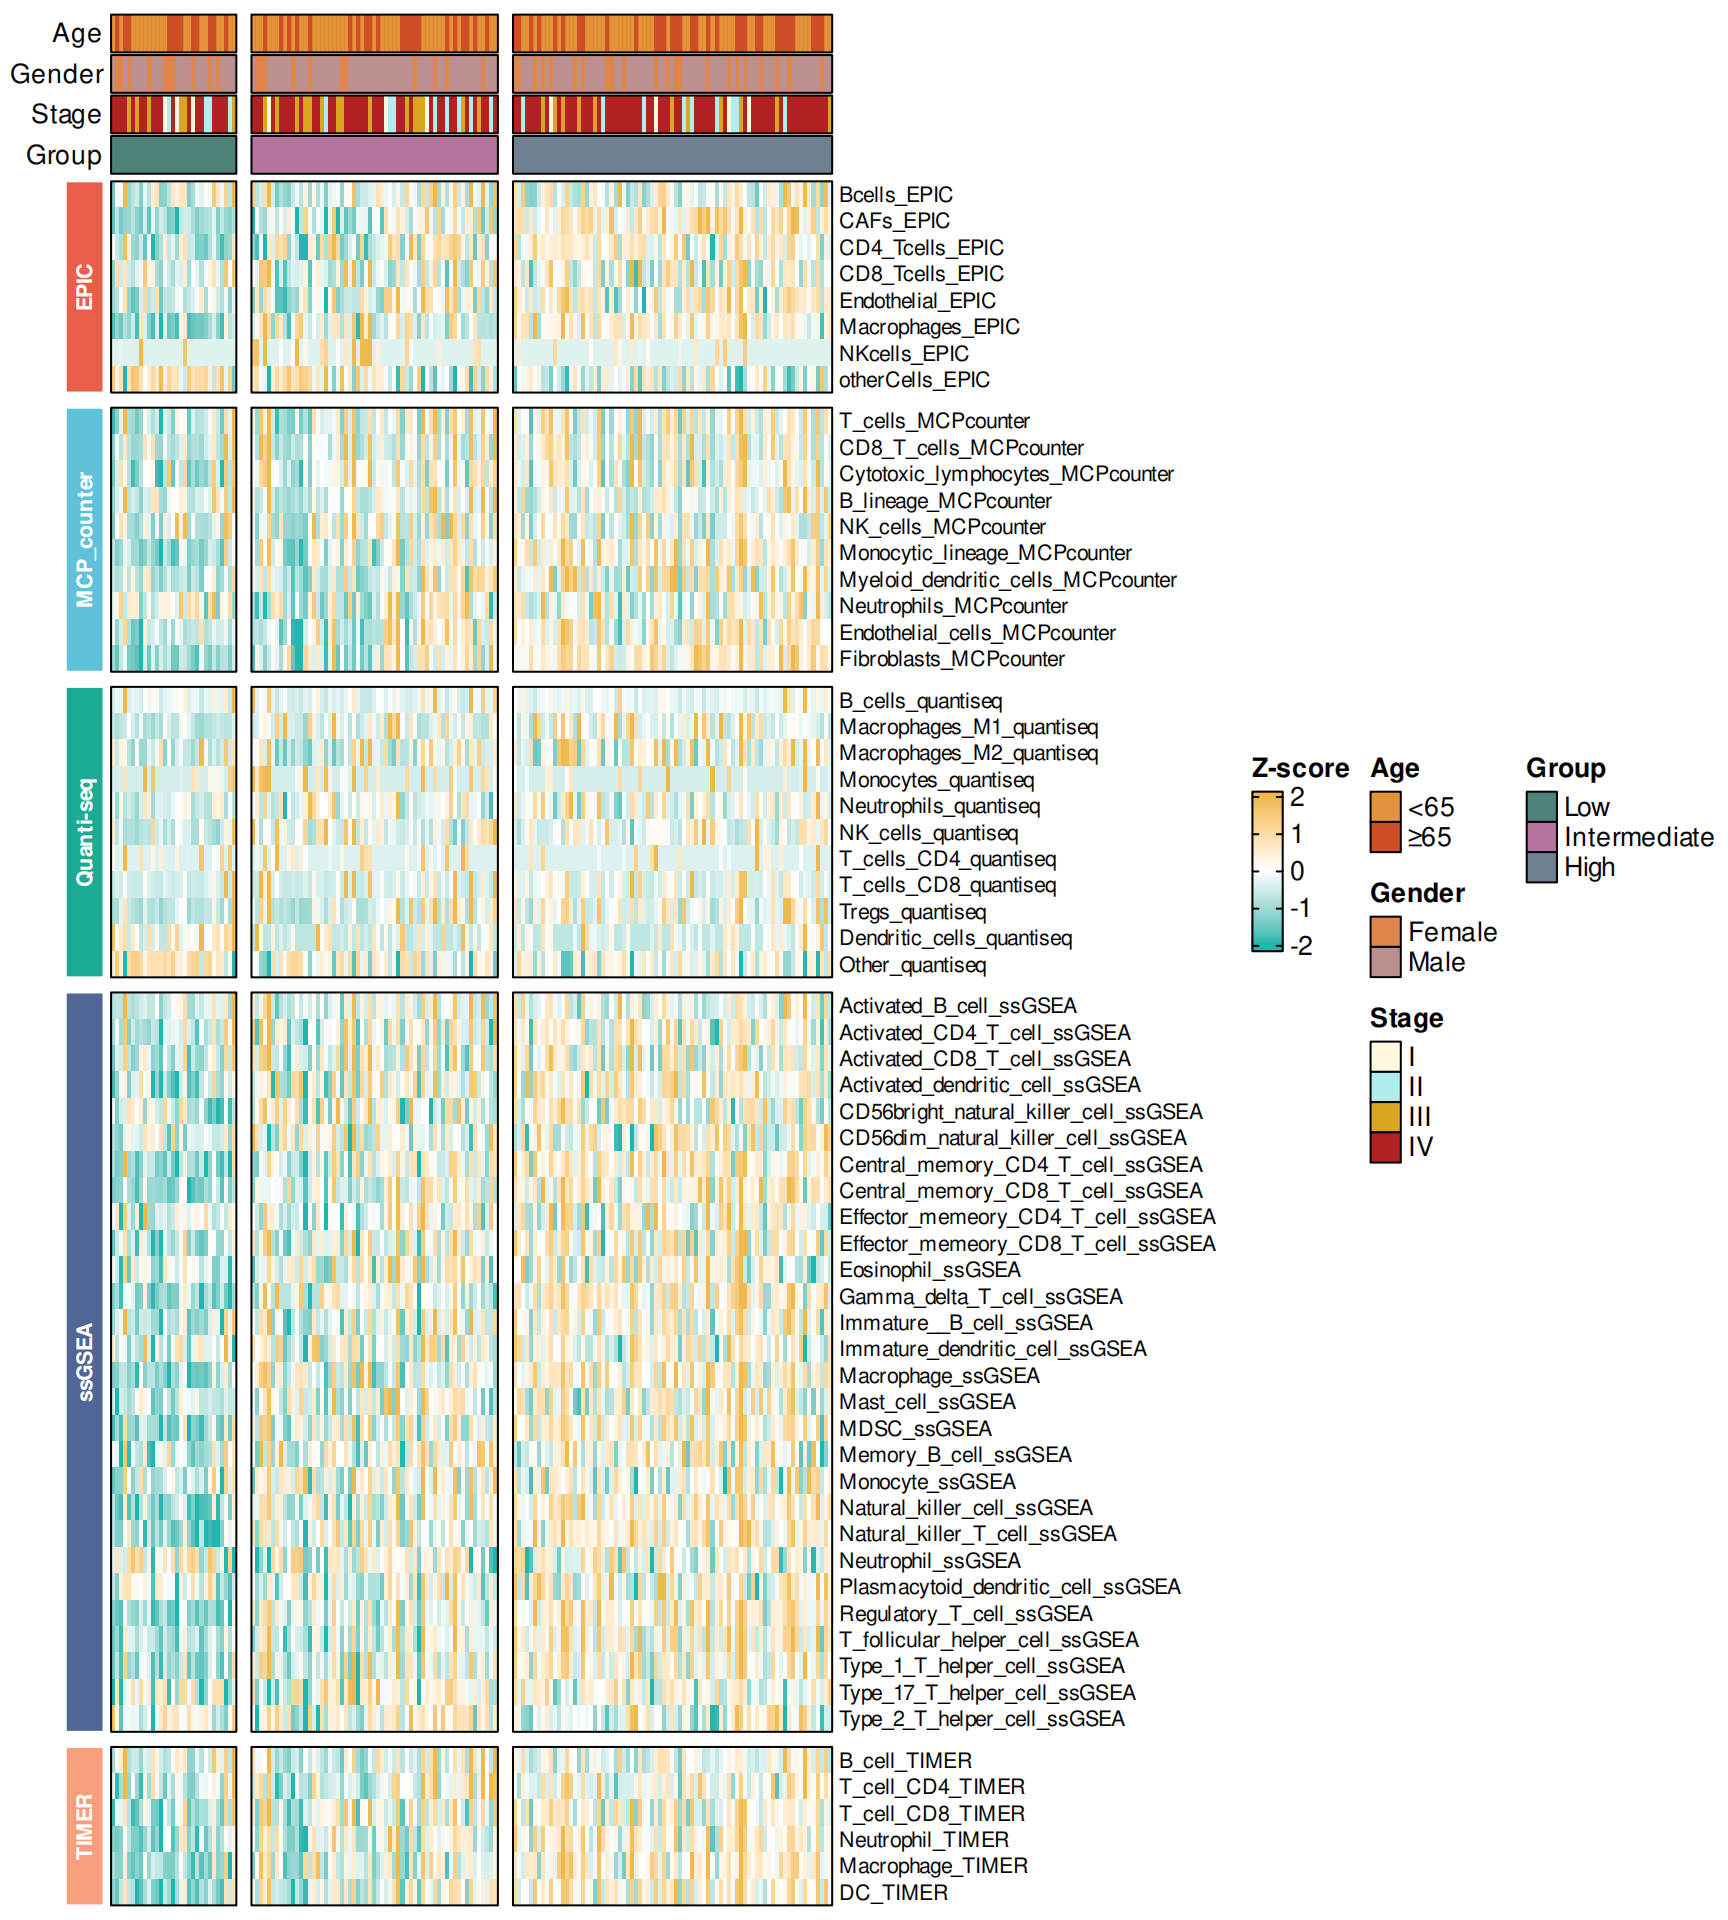


**Supplementary Figure 5** TME immune cell infiltration across LSCC clinical subgroups quantified by five deconvolution algorithms.

**Supplementary Table 1** Fibroblast genesets.

| gene | cluster |
| --- | --- |
| CXCL2 | c1-fibro-IL6 |
| IL6 | c1-fibro-IL6 |
| SOD2 | c1-fibro-IL6 |
| PTGS2 | c1-fibro-IL6 |
| IER3 | c1-fibro-IL6 |
| CXCL1 | c1-fibro-IL6 |
| GPRC5A | c1-fibro-IL6 |
| PTX3 | c1-fibro-IL6 |
| NFKBIA | c1-fibro-IL6 |
| TNFAIP6 | c1-fibro-IL6 |
| SEMA4A | c1-fibro-IL6 |
| DNAJB1 | c1-fibro-IL6 |
| FOSB | c1-fibro-IL6 |
| SERPINE2 | c1-fibro-IL6 |
| IRF1 | c1-fibro-IL6 |
| SPSB1 | c1-fibro-IL6 |
| GFPT2 | c1-fibro-IL6 |
| INTS6 | c1-fibro-IL6 |
| KLF4 | c1-fibro-IL6 |
| UAP1 | c1-fibro-IL6 |
| UGDH | c1-fibro-IL6 |
| RND3 | c1-fibro-IL6 |
| ICAM1 | c1-fibro-IL6 |
| MEDAG | c1-fibro-IL6 |
| NFKB1 | c1-fibro-IL6 |
| NFKBIZ | c1-fibro-IL6 |
| NAMPT | c1-fibro-IL6 |
| HSPH1 | c1-fibro-IL6 |
| PLA2G2A | c1-fibro-IL6 |
| CXCL8 | c1-fibro-IL6 |
| POSTN | c2-fibro-POSTN |
| MMP1 | c2-fibro-POSTN |
| COL1A1 | c2-fibro-POSTN |
| TNC | c2-fibro-POSTN |
| CTHRC1 | c2-fibro-POSTN |
| COL3A1 | c2-fibro-POSTN |
| MMP11 | c2-fibro-POSTN |
| KIF26B | c2-fibro-POSTN |
| COL1A2 | c2-fibro-POSTN |
| IGFBP3 | c2-fibro-POSTN |
| COL6A3 | c2-fibro-POSTN |
| LSAMP | c2-fibro-POSTN |
| COL5A2 | c2-fibro-POSTN |
| COL8A1 | c2-fibro-POSTN |
| DELEC1 | c2-fibro-POSTN |
| HMCN1 | c2-fibro-POSTN |
| WNT5A | c2-fibro-POSTN |
| TWIST2 | c2-fibro-POSTN |
| SERPINE1 | c2-fibro-POSTN |
| SPARC | c2-fibro-POSTN |
| CDH11 | c2-fibro-POSTN |
| COL12A1 | c2-fibro-POSTN |
| PAPPA | c2-fibro-POSTN |
| GREM1 | c2-fibro-POSTN |
| COL5A1 | c2-fibro-POSTN |
| ASPN | c2-fibro-POSTN |
| COL11A1 | c2-fibro-POSTN |
| ADAMTS2 | c2-fibro-POSTN |
| COL6A1 | c2-fibro-POSTN |
| PTGDS | c2-fibro-POSTN |
| RGS5.1 | c3-fibro-TAGLN |
| TAGLN | c3-fibro-TAGLN |
| MYH11 | c3-fibro-TAGLN |
| MYL9 | c3-fibro-TAGLN |
| INPP4B | c3-fibro-TAGLN |
| MCAM | c3-fibro-TAGLN |
| TPM2 | c3-fibro-TAGLN |
| NDUFA4L2 | c3-fibro-TAGLN |
| NOTCH3 | c3-fibro-TAGLN |
| TINAGL1 | c3-fibro-TAGLN |
| PPP1R14A | c3-fibro-TAGLN |
| EPS8 | c3-fibro-TAGLN |
| NCKAP5 | c3-fibro-TAGLN |
| IGFBP7 | c3-fibro-TAGLN |
| SORBS2 | c3-fibro-TAGLN |
| MEF2C | c3-fibro-TAGLN |
| FABP4 | c3-fibro-TAGLN |
| RERGL | c3-fibro-TAGLN |
| STEAP4 | c3-fibro-TAGLN |
| HTR1F | c3-fibro-TAGLN |
| A2M | c3-fibro-TAGLN |
| MYLK | c3-fibro-TAGLN |
| PDE3A | c3-fibro-TAGLN |
| RGS6 | c3-fibro-TAGLN |
| SYNPO2 | c3-fibro-TAGLN |
| NR2F2 | c3-fibro-TAGLN |
| RGS16 | c3-fibro-TAGLN |
| C11orf96 | c3-fibro-TAGLN |
| COL4A2 | c3-fibro-TAGLN |
| RCAN2 | c3-fibro-TAGLN |
| GNB2L1 | c5-fibro-KRT13 |
| KRT13 | c5-fibro-KRT13 |
| H3F3B | c5-fibro-KRT13 |
| H3F3A | c5-fibro-KRT13 |
| ATP5E | c5-fibro-KRT13 |
| SELM | c5-fibro-KRT13 |
| S100A9 | c5-fibro-KRT13 |
| S100A8 | c5-fibro-KRT13 |
| CYR61 | c5-fibro-KRT13 |
| TCEB2 | c5-fibro-KRT13 |
| SEPT7 | c5-fibro-KRT13 |
| ATP5L | c5-fibro-KRT13 |
| SEPW1 | c5-fibro-KRT13 |
| PTRF | c5-fibro-KRT13 |
| NUPR1 | c5-fibro-KRT13 |
| SPRR3 | c5-fibro-KRT13 |
| ATP5I | c5-fibro-KRT13 |
| SEPP1 | c5-fibro-KRT13 |
| PRKCDBP | c5-fibro-KRT13 |
| ATP5J | c5-fibro-KRT13 |
| S100A2 | c5-fibro-KRT13 |
| GLTSCR2 | c5-fibro-KRT13 |
| ATP5G2 | c5-fibro-KRT13 |
| LHFP | c5-fibro-KRT13 |
| ATP5D | c5-fibro-KRT13 |
| CTGF | c5-fibro-KRT13 |
| C14orf2 | c5-fibro-KRT13 |
| SHFM1 | c5-fibro-KRT13 |
| KRT4 | c5-fibro-KRT13 |
| USMG5 | c5-fibro-KRT13 |
| NRXN1 | c6-fibro-APOD |
| CDH19 | c6-fibro-APOD |
| SCN7A | c6-fibro-APOD |
| CLDN1 | c6-fibro-APOD |
| ITGA6 | c6-fibro-APOD |
| NGFR | c6-fibro-APOD |
| MATN2 | c6-fibro-APOD |
| TENM2 | c6-fibro-APOD |
| ARHGEF28 | c6-fibro-APOD |
| MCTP1 | c6-fibro-APOD |
| ANGPTL7 | c6-fibro-APOD |
| SLC22A3 | c6-fibro-APOD |
| NRP2 | c6-fibro-APOD |
| PTGDS | c6-fibro-APOD |
| MTSS1 | c6-fibro-APOD |
| SORBS1 | c6-fibro-APOD |
| DOCK5 | c6-fibro-APOD |
| MEOX2 | c6-fibro-APOD |
| ARHGAP42 | c6-fibro-APOD |
| STARD13 | c6-fibro-APOD |
| APOD | c6-fibro-APOD |
| KIAA1217 | c6-fibro-APOD |
| EBF2 | c6-fibro-APOD |
| PLP1 | c6-fibro-APOD |
| ANK3 | c6-fibro-APOD |
| NRXN3 | c6-fibro-APOD |
| BNC2 | c6-fibro-APOD |
| NCAM2 | c6-fibro-APOD |
| ITGB8 | c6-fibro-APOD |
| ADGRB3 | c6-fibro-APOD |
| PDZRN4 | c0-fibro-MFAP4 |
| CFD | c0-fibro-MFAP4 |
| IGFBP6 | c0-fibro-MFAP4 |
| SLPI | c0-fibro-MFAP4 |
| GSN | c0-fibro-MFAP4 |
| MGST1 | c0-fibro-MFAP4 |
| MFAP5 | c0-fibro-MFAP4 |
| MFAP4 | c0-fibro-MFAP4 |
| SFRP2 | c0-fibro-MFAP4 |
| PCOLCE2 | c0-fibro-MFAP4 |
| S100A10 | c0-fibro-MFAP4 |
| MYOC | c0-fibro-MFAP4 |
| TNXB | c0-fibro-MFAP4 |
| CST3 | c0-fibro-MFAP4 |
| OGN | c0-fibro-MFAP4 |
| DCN | c0-fibro-MFAP4 |
| NOX4 | c0-fibro-MFAP4 |
| LTBP4 | c0-fibro-MFAP4 |
| PLAC9 | c0-fibro-MFAP4 |
| FBLN1 | c0-fibro-MFAP4 |
| OMD | c0-fibro-MFAP4 |
| LEPR | c0-fibro-MFAP4 |
| NOVA1 | c0-fibro-MFAP4 |
| CLU | c0-fibro-MFAP4 |
| PTGIS | c0-fibro-MFAP4 |
| MGP | c0-fibro-MFAP4 |
| RAMP2 | c0-fibro-MFAP4 |
| PDGFRL | c0-fibro-MFAP4 |
| CCDC80 | c0-fibro-MFAP4 |
| S100A6 | c0-fibro-MFAP4 |
| CADM2 | c4-fibro-APOC1 |
| DLK1 | c4-fibro-APOC1 |
| APOC1 | c4-fibro-APOC1 |
| MEG8 | c4-fibro-APOC1 |
| KLHL41 | c4-fibro-APOC1 |
| MEG3 | c4-fibro-APOC1 |
| TUBB2B | c4-fibro-APOC1 |
| RUNX1 | c4-fibro-APOC1 |
| ELL2 | c4-fibro-APOC1 |
| NEB | c4-fibro-APOC1 |
| MAT2A | c4-fibro-APOC1 |
| PCDH7 | c4-fibro-APOC1 |
| EZR | c4-fibro-APOC1 |
| MYF5 | c4-fibro-APOC1 |
| MYO18B | c4-fibro-APOC1 |
| KCNQ5 | c4-fibro-APOC1 |
| APOE | c4-fibro-APOC1 |
| PAX7 | c4-fibro-APOC1 |
| UGCG | c4-fibro-APOC1 |
| TRDN | c4-fibro-APOC1 |
| NPTX2 | c4-fibro-APOC1 |
| YBX3 | c4-fibro-APOC1 |
| NAV2 | c4-fibro-APOC1 |
| PVT1 | c4-fibro-APOC1 |
| NNMT | c4-fibro-APOC1 |
| MT1A | c4-fibro-APOC1 |
| HIVEP3 | c4-fibro-APOC1 |
| SOD2 | c4-fibro-APOC1 |
| MT1X | c4-fibro-APOC1 |
| SAMD4A | c4-fibro-APOC1 |

**Supplementary Table 2** Macrophage genesets.

| gene | cluster |
| --- | --- |
| APOE | c3-macro-APOE |
| APOC1 | c3-macro-APOE |
| CTSD | c3-macro-APOE |
| IFI27 | c3-macro-APOE |
| ATP5E | c3-macro-APOE |
| C1QB | c3-macro-APOE |
| C1QA | c3-macro-APOE |
| GNB2L1 | c3-macro-APOE |
| H3F3A | c3-macro-APOE |
| CD81 | c3-macro-APOE |
| CD68 | c3-macro-APOE |
| GPNMB | c3-macro-APOE |
| CTSB | c3-macro-APOE |
| CAPG | c3-macro-APOE |
| LGALS1 | c3-macro-APOE |
| PRDX1 | c3-macro-APOE |
| HLA-DRB1 | c3-macro-APOE |
| PLD3 | c3-macro-APOE |
| GRN | c3-macro-APOE |
| ATP5L | c3-macro-APOE |
| TMEM176B | c3-macro-APOE |
| FABP5 | c3-macro-APOE |
| C1QC | c3-macro-APOE |
| FTL | c3-macro-APOE |
| GPX1 | c3-macro-APOE |
| MT1G | c3-macro-APOE |
| SPP1 | c3-macro-APOE |
| MT1X | c3-macro-APOE |
| MMP12 | c3-macro-APOE |
| CCL18 | c3-macro-APOE |
| SELENOP | c1-macro-SELENOP |
| F13A1 | c1-macro-SELENOP |
| SLC16A10 | c1-macro-SELENOP |
| LMNA | c1-macro-SELENOP |
| FMNL2 | c1-macro-SELENOP |
| MRC1 | c1-macro-SELENOP |
| RBPJ | c1-macro-SELENOP |
| LYVE1 | c1-macro-SELENOP |
| GPR183 | c1-macro-SELENOP |
| RNASE1 | c1-macro-SELENOP |
| FMN1 | c1-macro-SELENOP |
| FRMD4A | c1-macro-SELENOP |
| PDE4D | c1-macro-SELENOP |
| SPRED1 | c1-macro-SELENOP |
| LRMDA | c1-macro-SELENOP |
| SEMA4A | c1-macro-SELENOP |
| HLA-DQB1 | c1-macro-SELENOP |
| HLA-DPB1 | c1-macro-SELENOP |
| SLC9A9 | c1-macro-SELENOP |
| NRP1 | c1-macro-SELENOP |
| HLA-DQA1 | c1-macro-SELENOP |
| C1QC | c1-macro-SELENOP |
| ZNF331 | c1-macro-SELENOP |
| HLA-DRA | c1-macro-SELENOP |
| HMOX1 | c1-macro-SELENOP |
| COLEC12 | c1-macro-SELENOP |
| PDGFC | c1-macro-SELENOP |
| ANKH | c1-macro-SELENOP |
| CST3 | c1-macro-SELENOP |
| HLA-DPA1 | c1-macro-SELENOP |
| CXCL5 | c2-mono-VCAN |
| VCAN | c2-mono-VCAN |
| CCL20 | c2-mono-VCAN |
| SERPINB2 | c2-mono-VCAN |
| EREG | c2-mono-VCAN |
| TIMP1 | c2-mono-VCAN |
| INHBA | c2-mono-VCAN |
| PID1 | c2-mono-VCAN |
| FLT1 | c2-mono-VCAN |
| SNX9 | c2-mono-VCAN |
| ITGB8 | c2-mono-VCAN |
| CD300E | c2-mono-VCAN |
| PLCB1 | c2-mono-VCAN |
| CRADD | c2-mono-VCAN |
| PALM2AKAP2 | c2-mono-VCAN |
| KYNU | c2-mono-VCAN |
| JARID2 | c2-mono-VCAN |
| WARS1 | c2-mono-VCAN |
| FCN1 | c2-mono-VCAN |
| PLIN2 | c2-mono-VCAN |
| SMAD3 | c2-mono-VCAN |
| SLC39A8 | c2-mono-VCAN |
| MAP2K1 | c2-mono-VCAN |
| TNIP3 | c2-mono-VCAN |
| CD44 | c2-mono-VCAN |
| NOCT | c2-mono-VCAN |
| TCF7L2 | c2-mono-VCAN |
| NRIP1 | c2-mono-VCAN |
| THBS1 | c2-mono-VCAN |
| CXCL3 | c2-mono-VCAN |
| CCL5 | c4-dc-CCL5 |
| FYN | c4-dc-CCL5 |
| GNLY | c4-dc-CCL5 |
| CNOT6L | c4-dc-CCL5 |
| IL32 | c4-dc-CCL5 |
| SKAP1 | c4-dc-CCL5 |
| GZMB | c4-dc-CCL5 |
| CD3D | c4-dc-CCL5 |
| BICDL1 | c4-dc-CCL5 |
| PPP1R16B | c4-dc-CCL5 |
| RORA | c4-dc-CCL5 |
| NKG7 | c4-dc-CCL5 |
| GZMA | c4-dc-CCL5 |
| CD2 | c4-dc-CCL5 |
| TRBC2 | c4-dc-CCL5 |
| CXCL13 | c4-dc-CCL5 |
| ETS1 | c4-dc-CCL5 |
| TOX | c4-dc-CCL5 |
| CD247 | c4-dc-CCL5 |
| KLF12 | c4-dc-CCL5 |
| TRAC | c4-dc-CCL5 |
| PTPN22 | c4-dc-CCL5 |
| CD3G | c4-dc-CCL5 |
| CAMK4 | c4-dc-CCL5 |
| CD96 | c4-dc-CCL5 |
| BCL11B | c4-dc-CCL5 |
| THEMIS | c4-dc-CCL5 |
| CBLB | c4-dc-CCL5 |
| RNF19A | c4-dc-CCL5 |
| PDE3B | c4-dc-CCL5 |
| IFITM2 | c0-neu-FCGR3B |
| FCGR3B | c0-neu-FCGR3B |
| HCAR3 | c0-neu-FCGR3B |
| AQP9 | c0-neu-FCGR3B |
| PROK2 | c0-neu-FCGR3B |
| G0S2 | c0-neu-FCGR3B |
| LIMK2 | c0-neu-FCGR3B |
| S100A8 | c0-neu-FCGR3B |
| CSF3R | c0-neu-FCGR3B |
| KCNJ15 | c0-neu-FCGR3B |
| CPD | c0-neu-FCGR3B |
| HCAR2 | c0-neu-FCGR3B |
| OSM | c0-neu-FCGR3B |
| TECPR2 | c0-neu-FCGR3B |
| NEDD9 | c0-neu-FCGR3B |
| CMTM2 | c0-neu-FCGR3B |
| NAMPT | c0-neu-FCGR3B |
| PLEK | c0-neu-FCGR3B |
| IVNS1ABP | c0-neu-FCGR3B |
| PDE4B | c0-neu-FCGR3B |
| CXCR2 | c0-neu-FCGR3B |
| LUCAT1 | c0-neu-FCGR3B |
| CXCL8 | c0-neu-FCGR3B |
| IL1R2 | c0-neu-FCGR3B |
| ADGRG3 | c0-neu-FCGR3B |
| BCL6 | c0-neu-FCGR3B |
| RUBCNL | c0-neu-FCGR3B |
| PI3 | c0-neu-FCGR3B |
| IFIT2 | c0-neu-FCGR3B |
| KATNBL1 | c0-neu-FCGR3B |
| STMN1 | c5-dc-STMN1 |
| HIST1H4C | c5-dc-STMN1 |
| TOP2A | c5-dc-STMN1 |
| MKI67 | c5-dc-STMN1 |
| CENPF | c5-dc-STMN1 |
| TYMS | c5-dc-STMN1 |
| PTTG1 | c5-dc-STMN1 |
| CDK1 | c5-dc-STMN1 |
| H2AFZ | c5-dc-STMN1 |
| H2AFV | c5-dc-STMN1 |
| ATP5J2 | c5-dc-STMN1 |
| ATP5G3 | c5-dc-STMN1 |
| TUBA1B | c5-dc-STMN1 |
| TUBB | c5-dc-STMN1 |
| HMGB2 | c5-dc-STMN1 |
| ATP5L | c5-dc-STMN1 |
| HMGN2 | c5-dc-STMN1 |
| GNB2L1 | c5-dc-STMN1 |
| HMGB1 | c5-dc-STMN1 |
| NUCKS1 | c5-dc-STMN1 |
| DUT | c5-dc-STMN1 |
| PTMA | c5-dc-STMN1 |
| ATP5E | c5-dc-STMN1 |
| C1QB | c5-dc-STMN1 |
| IFI27 | c5-dc-STMN1 |
| APOC1 | c5-dc-STMN1 |
| CTSD | c5-dc-STMN1 |
| APOE | c5-dc-STMN1 |
| SPP1 | c5-dc-STMN1 |
| H4C3 | c5-dc-STMN1 |

**Supplementary Table 3** Docking score table showing the top 9 docking poses with docking score, confidence score, and ligand RMSD (Root Mean Square Deviation).

| **Rank** | **Docking Score** | **Confidence Score** | **Ligand rmsd** **(Å)** |
| --- | --- | --- | --- |
| 1 | -252.68 | 0.8863 | 83.94 |
| 2 | -251.49 | 0.8839 | 71.48 |
| 3 | -250.73 | 0.8823 | 70.26 |
| 4 | -242.32 | 0.8637 | 65.99 |
| 5 | -238.87 | 0.8554 | 80.03 |
| 6 | -237.38 | 0.8516 | 61.86 |
| 7 | -235.91 | 0.8479 | 88.02 |
| 8 | -233.94 | 0.8427 | 73.3 |
| 9 | -233.11 | 0.8405 | 65.17 |
